# Supplementary material for: Impact of MSMEG5257 Deletion on Mycolicibacterium smegmatis Growth
Source: MDPI journal article supplement (doi:10.3390/microorganisms12040770), 2024-04-11
Supplement: s1 [file s1]

## Supplementary materials

Table S1. List of primers, strains, plasmids, antibodies, and ELISA kits used in the study.

| List of primers used in the study for cloning purposes |                                                         |                                                              |
|--------------------------------------------------------|---------------------------------------------------------|--------------------------------------------------------------|
| Name                                                   | Primers (5'-3')                                         | Usage                                                        |
| OE- <i>msmeg5257</i> -Fwd                              | TGATTAAC TTTATAAGGAGGAAAAAC<br>ATATGATGACCGCGCCGATCGACG | Construction of the overexpression of <i>msmeg5257</i> in Ms |
| OE- <i>msmeg5257</i> -Rev                              | TCTTCAGAAATAAGTTTTTGTTCCAA<br>GCTTGCGGTAGTCCGGC         |                                                              |
| sgRNA- <i>msmeg5257</i> -Fwd                           | GGGACCCAGTTCTTCGGAAAACCA                                | Construction of the deletion of <i>msmeg5257</i> in Ms       |
| sgRNA- <i>msmeg5257</i> -Rev                           | AAACTGGTTTTCCGAAGAACTGGG                                |                                                              |
| Cas9-Asp-Fwd                                           | AGCATCGGCCTGGACATCGGCACGAA<br>CTCGGTGGGCT               |                                                              |
| Cas9-Asp-Rev                                           | GTTCGTGCCGATGTCCAGGCCGATGCT<br>GTACTTCTTGTCATATGTATAT   |                                                              |
| Cas9-His-Fwd                                           | TACGACGTGGACCACATCGTGCCGCA<br>GTCGTTCTGAAG              |                                                              |
| Cas9-His-Rev                                           | CTGCGGCACGATGTGGTCCACGTCGTA<br>GTCGCTCAGCCG             |                                                              |
| List of primers used in the study for RT-PCR           |                                                         |                                                              |
| <i>msmeg4509</i> -Fwd                                  | GTCGATCCTTCCCGGCAACC                                    |                                                              |
| <i>msmeg4509</i> -Rev                                  | GGGTCGGAGTACAGCGTG TTC                                  |                                                              |
| <i>msmeg4510</i> -Fwd                                  | AGTACGTCGTGGCGATGCTC                                    |                                                              |
| <i>msmeg4510</i> -Rev                                  | GGTGAAGACGATGTAGGCGCC                                   |                                                              |
| <i>msmeg4511</i> -Fwd                                  | CGGTCTGCCCAAAGGTG TTC                                   |                                                              |
| <i>msmeg4511</i> -Rev                                  | CGGTCAGGTAGCCGATGTC                                     |                                                              |
| <i>msmeg4512</i> -Fwd                                  | GGTGTGGTGCTCGTCGGAT                                     |                                                              |
| <i>msmeg4512</i> -Rev                                  | ACCTGGTGCCATTGCTCGG                                     |                                                              |
| <i>msmeg4513</i> -Fwd                                  | ACTGCGATCTGGCGGTGAC                                     |                                                              |
| <i>msmeg4513</i> -Rev                                  | GGTGCGTCCGTCCTGGTTGA                                    |                                                              |
| <i>msmeg4515</i> -Fwd                                  | AGGCACCACTGGCTGGATC                                     |                                                              |

|                      |                       |
|----------------------|-----------------------|
| <i>msmeg4515-Rev</i> | TCGTCGTATCGGTCAGGTCG  |
| <i>msmeg4516-Fwd</i> | CCGCCGACGACGTCTATCT   |
| <i>msmeg4516-Rev</i> | CCAAGGGTTCCCACGCACAC  |
| <i>msmeg1373-Fwd</i> | CAAGGTGATGGCGGCGATGG  |
| <i>msmeg1373-Rev</i> | AGGCGCTGAAGTCGGTGAG   |
| <i>msmeg1613-Fwd</i> | GCATGAAGCCCGCGAAAGTC  |
| <i>msmeg1613-Rev</i> | TCGTGGTCAGCGCCAGGTA   |
| <i>msmeg1709-Fwd</i> | ATCTGAGCGTGGGTTCGGTG  |
| <i>msmeg1709-Rev</i> | CCGGGTCGTTGATCGGTATCG |
| <i>msmeg2635-Fwd</i> | CCTACCTCGCCCACAACACC  |
| <i>msmeg2635-Rev</i> | GGGAAGAACGCCATGAGCACG |
| <i>msmeg2846-Fwd</i> | GCCCAGGTGCTGCTCAAGAA  |
| <i>msmeg2846-Rev</i> | GACCGGGAGAACACGGTCTC  |
| <i>msmeg3999-Fwd</i> | ACCGAGTCTGATGCCCCGAA  |
| <i>msmeg3999-Rev</i> | TCGTCCACGAGCAACCCCT   |
| <i>msmeg5102-Fwd</i> | CGCCCTGAGGTCCTGATGC   |
| <i>msmeg5102-Rev</i> | GTACGCCGTGAAGTTGCCG   |
| <i>msmeg5368-Fwd</i> | AGATCAACGTCGGCTTCGCC  |
| <i>msmeg5368-Rev</i> | CGGATTGCTGAACGCTGCCT  |
| <i>msmeg5370-Fwd</i> | GTGGATCTCCTGGCCGTCC   |
| <i>msmeg5370-Rev</i> | ACTGCCCTTGGGGAATCGC   |
| <i>msmeg5660-Fwd</i> | CCGCAAGGACCTCTACGCAC  |

|                       |                       |
|-----------------------|-----------------------|
| <i>msmeg5660</i> -Rev | ACCAGCACCACGACACCCA   |
| <i>msmeg6332</i> -Fwd | GCGGCGAGCATCATCTTCAC  |
| <i>msmeg6332</i> -Rev | GCGGCAGTTCGACTTTGAGC  |
| <i>msmeg6333</i> -Fwd | CAAACCTCGCCGACCGCTATC |
| <i>msmeg6333</i> -Rev | GCCTCGTCGATGTCATGGG   |
| <i>msmeg6334</i> -Fwd | CGCCGAGGACAAGGACACC   |
| <i>msmeg6334</i> -Rev | CGCTGATCGCGACGAAGTTG  |
| 16S-Fwd               | GGGCGATACGGGCAGACTA   |
| 16S-Rev               | CACGGATCCCAAGGAAGGA   |

#### List of strains and plasmids used in the study

| Strains and plasmids                    | Description                                                     | Reference       |
|-----------------------------------------|-----------------------------------------------------------------|-----------------|
| <i>E. coli</i> DH5 $\alpha$             | <i>E. coli</i> DH5 $\alpha$ for molecular cloning               | CWBIO           |
| <i>M. smegmatis</i> mc <sup>2</sup> 155 | <i>M. smegmatis</i> mc <sup>2</sup> 155 parental strain         | ATCC            |
| Ms_ <i>vec</i>                          | The empty vector in Ms                                          | This study      |
| Ms_ $\Delta$ <i>msmeg5257</i>           | Deletion of <i>msmeg5257</i> in Ms                              | This study      |
| Ms_OE- <i>msmeg5257</i>                 | Overexpression of <i>msmeg5257</i> in Ms                        | This study      |
| Ms_C- $\Delta$ <i>msmeg5257</i>         | Complement of <i>msmeg5257</i> in Ms_ $\Delta$ <i>msmeg5257</i> | This study      |
| Plasmids                                | Description                                                     | Reference       |
| pSUM-Kan-MCS2                           | Cloning vector                                                  | 109379, ADDGENE |
| pSUM-OE- <i>msmeg5257</i>               | <i>msmeg5257</i> Overexpression plasmid                         | This study      |
| pRH2521                                 | Cloning vector                                                  | 84380, ADDGENE  |
| pRH2502                                 | dCas9-induced expression plasmid                                | 84379, ADDGENE  |
| pRH2502-Cas9                            | Cas9-induced expression plasmid                                 | This study      |
| pRH2521-sgRNA- <i>msmeg5257</i>         | sgRNA-induced expression plasmid                                | This study      |

#### List of antibodies used in the study

| Name                    | Identifier    | Reference  |
|-------------------------|---------------|------------|
| Anti-MSMEG5257-antibody | NWTSVTARKWMKR | This study |

|                               |          |         |
|-------------------------------|----------|---------|
| Anti-rabbit IgG (H+L)         | 14708    | CTS     |
| Goat Anti-rabbit IgG (H&L)    | Y1055    | LABLEAD |
| Goat Anti-mouse IgG H&L (HRP) | ab205719 | ABCAM   |

Table S2 Drug name and concentration of drug susceptibility test.

| Drugs               | Concentrations (µg/mL)                                    |
|---------------------|-----------------------------------------------------------|
| Bedaquiline (BDQ)   | 0.008, 0.015, 0.03, 0.06, 0.12, 0.25, 0.5, and 1.         |
| Ethambutol (EMB)    | 0.25, 0.5, 1, 2, 4, 8, 16, and 32.                        |
| Rifampicin (RIF)    | 0.03, 0.06, 0.12, 0.25, 0.5, 1, 2, 4, and 8.              |
| Amikacin (AMI)      | 0.25, 0.5, 1, 2, 4, 8, and 16.                            |
| Levofloxacin (LEVO) | 0.12, 0.25, 0.5, 1, 2, 4, and 8.                          |
| Moxifloxacin (MXF)  | 0.06, 0.12, 0.25, 0.5, 1, 2, and 4.                       |
| Delamanid (DLM)     | 0.008, 0.015, 0.03, 0.06, 0.12, 0.25, and 0.5.            |
| Linezolid (LZD)     | 0.06, 0.12, 0.25, 0.5, 1, and 2.                          |
| Clofazimine (CFZ)   | 0.03, 0.06, 0.12, 0.25, 0.5, 1, and 2.                    |
| Ethionamide (ETO)   | 0.5, 1, 2, 4, and 8.                                      |
| Rifabutin (RFB)     | 0.06, 0.12, 0.25, 0.5, 1, and 2.                          |
| Isoniazid (INH)     | 0.025, 0.05, 0.1, 0.2, 0.4, 0.8, 1.6, 3.2, 6.4, and 12.8. |

Table S3 Drug susceptibility test of *msmeg5257* mutant strains.

| Drugs             | Minimum Inhibitory Concentration (µg/mL) |                       |
|-------------------|------------------------------------------|-----------------------|
|                   | Ms_WT                                    | Ms_Δ <i>msmeg5257</i> |
| Bedaquiline (BDQ) | 0.03                                     | 0.015                 |
| Clofazimine (CFZ) | 0.5-1                                    | 0.25-0.5              |

## Supplementary Figure

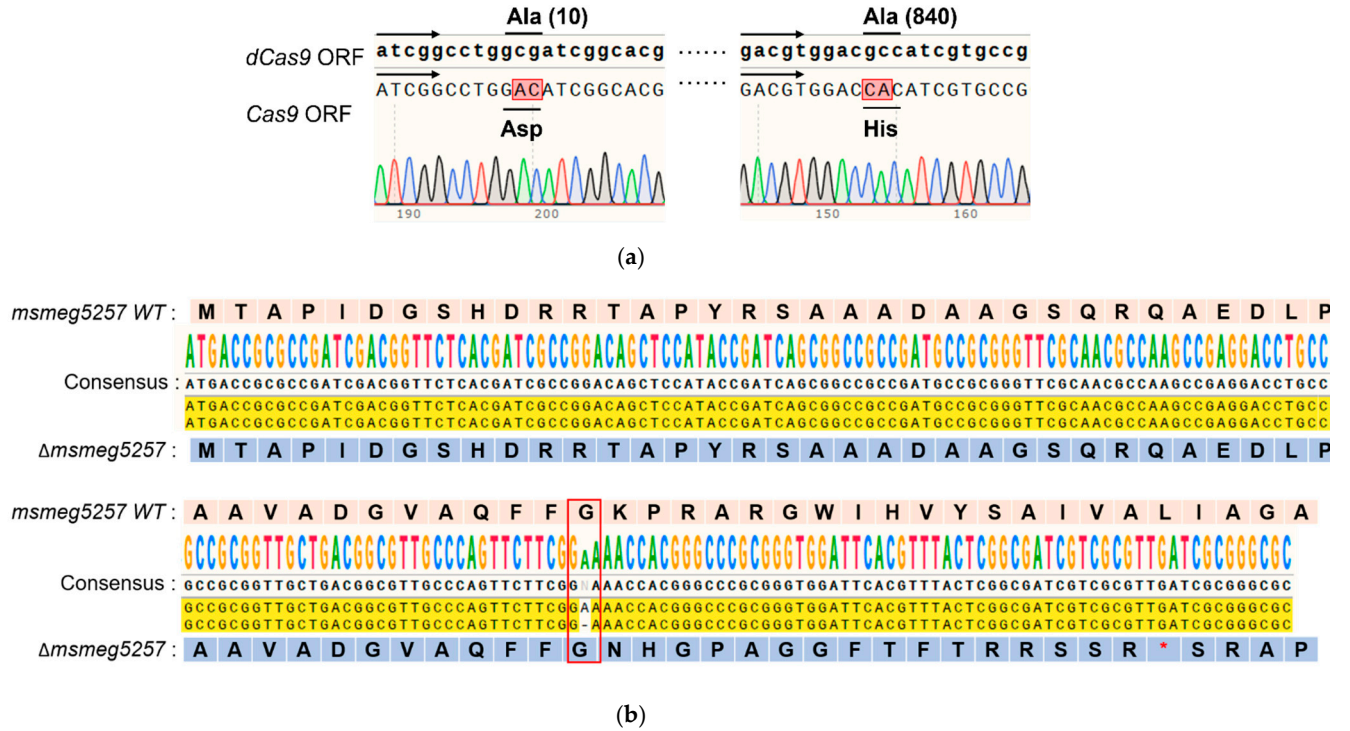

**Supplementary Figure S1.** Construction of *msmeg5257* deletion strain. (a) The sequencing outcome of the pRH2502-Cas9 plasmid. The Ala at position 10 changed to Asp, and Ala at position 840 changed to His in the *dCas9* amino acid (AA) sequence of pRH2502-*dCas9*. ORF, open reading frame. (b) The alignment results of the whole-genome sequencing for *Ms\_Δmsmeg5257*. Yellow: identical base; -: location of the base deletion.

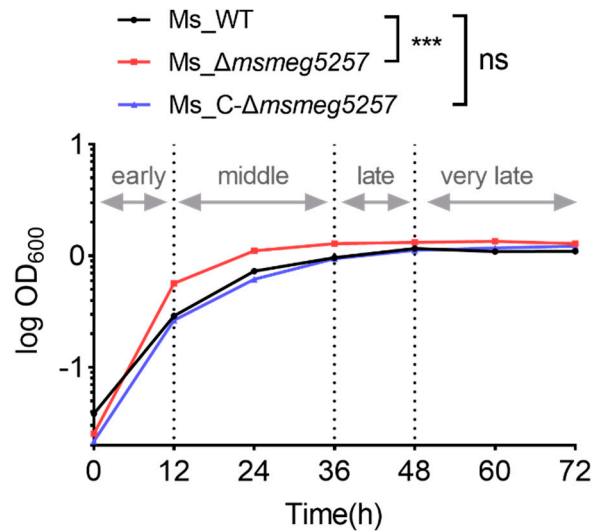

**Supplementary Figure S2.** The growth curve of wild-type *Ms* strains. The growth curve of *Ms* was divided into early (0-12 h), middle (13-36 h), late (37-48 h), and very late (>48 h) stages. \*\*\*:  $p$  values < 0.001 as a very significant difference; ns: no difference; WT: *Ms\_WT*;  $\Delta$ : *Ms\_Δmsmeg5257*; C- $\Delta$ : *Ms\_C-Δmsmeg5257*.

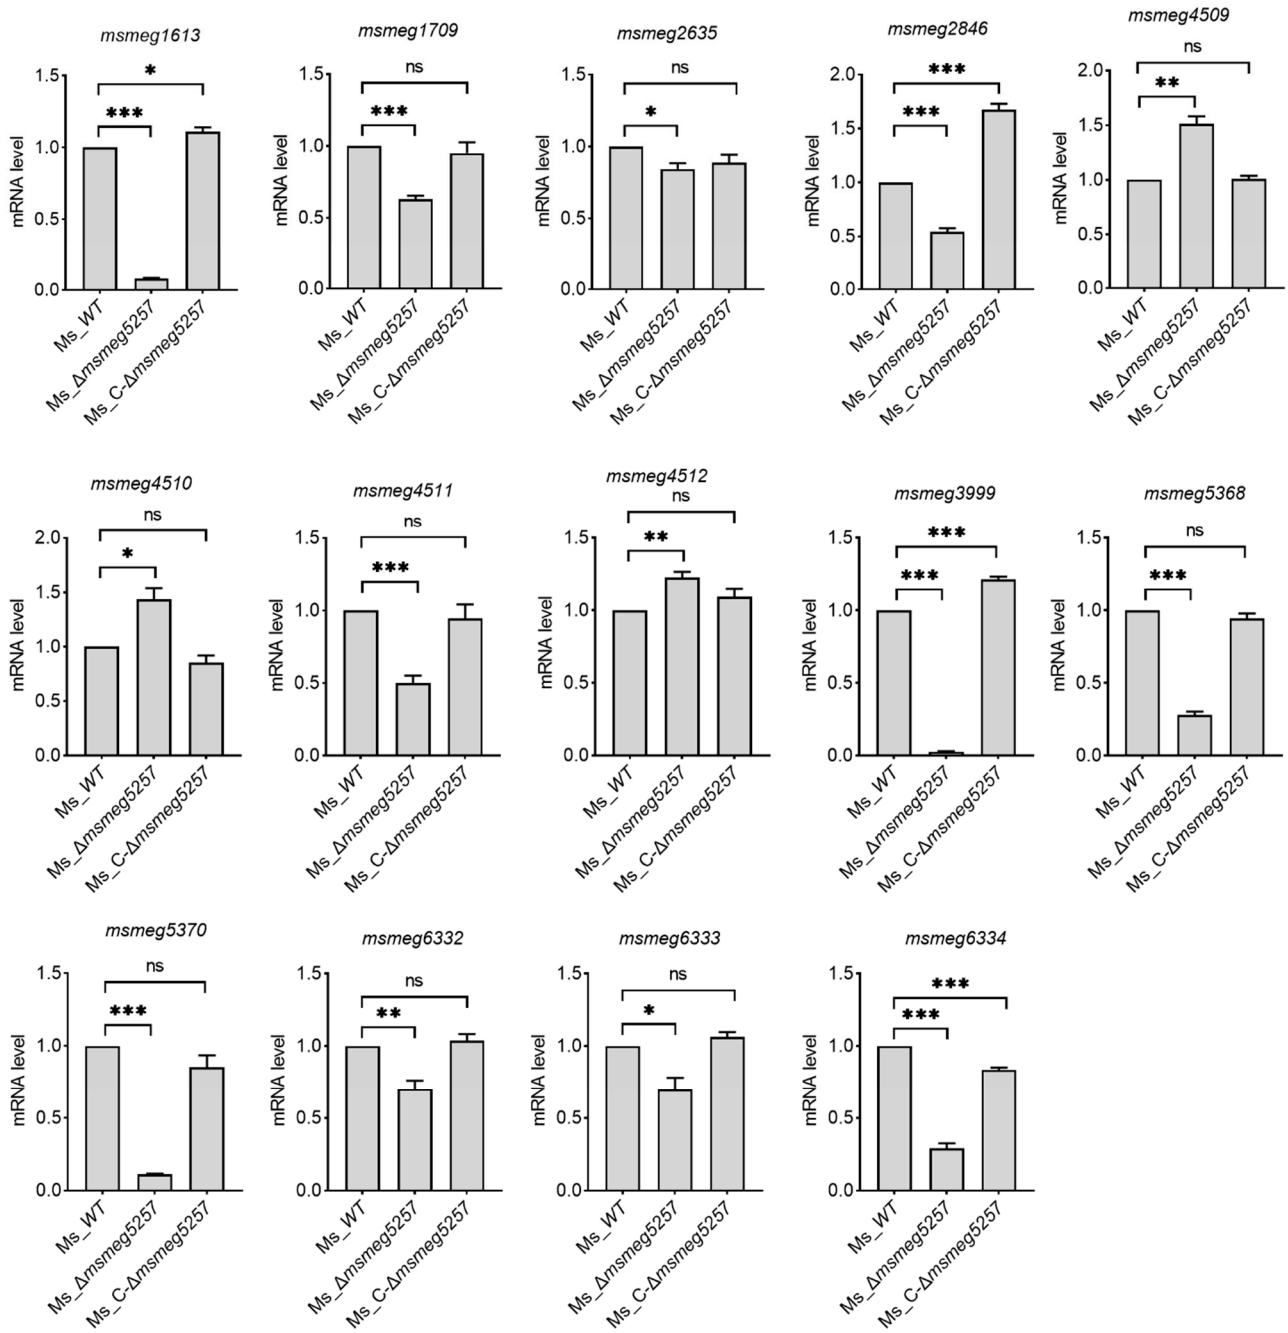

**Supplementary Figure S3.** Revisions in the mRNA expression levels of genes implicated in iron transport within the *msmeg5257* mutant strains. \*:  $p$  values < 0.05; \*\*:  $p$  values < 0.01; \*\*\*:  $p$  values < 0.001; ns: no difference.
